# Supplementary material
Source: MDPI journal article supplement (https://www.mdpi.com/2073-445X/9/11/406)
Supplement: s1 [file s1]

**SUPPLEMENTARY MATERIALS**

**Table S 1:** Overview of Main Workshop Activities

| <b>Workshop Activity</b>        | <b>Description</b>                                                                                                                                                                                                                                                                                                                                 | <b>Rationale</b>                                                                                                                                                                                                                                                             |
|---------------------------------|----------------------------------------------------------------------------------------------------------------------------------------------------------------------------------------------------------------------------------------------------------------------------------------------------------------------------------------------------|------------------------------------------------------------------------------------------------------------------------------------------------------------------------------------------------------------------------------------------------------------------------------|
| <b>Show Off Your Territory</b>  | Youth-led tour of the community and territory (incl. forest areas). Participants each choose one village and one territorial landmark of importance to them. Co-create map of landmarks, with annotations. Group designs route to be taken and sites to be visited. Participants explain their choice <i>in situ</i> .                             | Give youth a chance to interpret the landscape of their community and territory in real time w/peers. What meanings are embedded in the infrastructures and nature around them? Creates a different kind of forum for dialogue about place, values past, and future visions. |
| <b>Let's Talk About Forests</b> | Participants create a list of their Top Ten values that they associate with forests. Can be done individually, as single group, or in gendered groups with parallel lists created. Choices discussed in large group                                                                                                                                | To listen, understand and document the vocabulary, values and perspectives on forest environments (local and global) in the lives of participating youth. Opportunity to share outside (regional and global) perspectives on the value of local forests.                     |
| <b>Keep-Toss-Create</b>         | Participants list the things that they would like to keep in their communities, the things they would like to get rid of, and the new things they would like to see. Done as large group or in smaller sub-groups.                                                                                                                                 | To understand the pros and cons of village life, and see how these views are shared among the group and across genders.                                                                                                                                                      |
| <b>Push/Pull Matrix</b>         | Responding to the question, What are the benefits of village vs. city life?, participants work together to create a 4 quadrant "Push-Pull matrix" for cities and communities.                                                                                                                                                                      | Understand the forces that push or pull young people to move from one place to another.                                                                                                                                                                                      |
| <b>What's Your Ideal Job?</b>   | Participants work individually and then in groups to list and discuss their ideal jobs, and what drives their work aspirations.                                                                                                                                                                                                                    | Deep dive into youth perspectives on work and employment, to have frank discussion on what drives job, profession, and life decisions. Opportunity to see levels of interest in land-based / forest-based livelihoods.                                                       |
| <b>Media Headlines</b>          | Each participant writes a "newspaper headline" (anonymously) on a piece of paper. The headline is for an imagined "success story" about their village that you would like to see in 10 years.                                                                                                                                                      | A creative outlet for casting a vision for the future. Taking on a "media" voice can help release nuanced ideas and aspirations about the place of forest work and forest communities in the wider world                                                                     |
| <b>Pilot Projects</b>           | Group brainstorms work/project ideas that are: 1. Exciting; 2. Forest-oriented; and, 3. Financially Viable. Looking for ideas located in the area where these three values overlap. Small groups (3-5 people) develop a concept/idea into an entrepreneurial "Pilot Project" for the community. Presented to community leaderships where possible. | To elicit exciting and integrative ideas from youth participants about meaningful work in forest communities                                                                                                                                                                 |

1  
2  
3

4

5  
6  
7  
8  
9  
10  
11  
12  
13  
14  
15  
16  
17  
18  
19  
20  
21  
22  
23  
24  
25  
26  
27  
28  
29  
30  
31  
32  
33  
34  
35  
36  
37  
38  
39  
40  
41  
42  
43  
44  
45  
46  
47  
48  
49  
50  
51  
52  
53  
54  
55

**Table S 2: Participant Questionnaire**

Future of Forest Work Youth Visioning Workshop - SURVEY TEMPLATE.

Do not change the content of the questions as these must match the database. Each coordinator will need to make a translated paper copy for distribution to their youth participants. After completion, paper copies should be collected and data entered into the online Google Forms database by your facilitation team (coordinator, facilitator or assistant).

Date administered:

Location:

**Information about you and your family**

**Q1.** How old are you?

State age:

**Q2.** What is your gender?

Male

Female

Other:

**Q3.** Were you born in the community? (circle yes or no)

Yes

No

**Q3a.** If you answered 'No' to Q3, what year did you arrive in the community?

State year:

**Q4:** Are you married? (circle yes or no)

Yes

No

**Q5:** Do you have children? (circle yes or no)

Yes

No

**Q5a:** If you answered 'Yes' to Q5, how many children do you have?

State number:

**Q6.** What's the highest level of education you have completed to date? (check one)

Grade 9 (or equivalent) or Less

Some High School

High School Graduate (or equivalent)

- 56 Technical School or Community College
- 57 Some University
- 58 University Degree (Bachelor's)
- 59 Some Graduate Study
- 60 Graduate University Degree (Masters or PhD)

61

62 **Q6a.** If you are still studying, what level of education do you hope to attain?

63

64 State anticipated level:

65

66

67 **Q7.** List up to 3 of the things you like to do in your spare time:

- 68 -
- 69 -
- 70 -

71

72 **Q8.** What do you and your family do?

73

74 Respond ONLY to those that apply

- 75
- 76 Your primary occupation: \_\_\_\_\_
- 77 Your spouse's primary occupation (if applicable): \_\_\_\_\_
- 78 Father's primary occupation: \_\_\_\_\_
- 79 Mother's primary occupation: \_\_\_\_\_
- 80 Grandfather's primary occupation: \_\_\_\_\_
- 81 Grandmother's primary occupation: \_\_\_\_\_

82

83 **Q9.** What are the main sources of income for your family?

84

85 List:

- 86 -
- 87 -
- 88 -
- 89 -
- 90 -

91

92 **Work aspirations**

93

94 **Q10.** Please complete the following statement about yourself:

95

96 "I would like to be working as (a/an) \_\_\_\_\_ when I am 30 years old"

97

98 **Q11:** What are the most common jobs in the community right now?

99

100 List:

- 101 -
- 102 -
- 103 -
- 104 -

105

106 **Q12.** What jobs in the community are most appealing to you?

107

108 List:

109 -

110 -

111 -

112 -

113

114 **Q13.** For community members, what are the most common jobs in the city right now?

115

116 List:

117 -

118 -

119 -

120 -

121

122 **Q14.** What jobs in the city are most appealing to you?

123

124 List:

125 -

126 -

127 -

128 -

129

130 **Staying or moving**

131

132 **Q15.** Please complete the following statement:

133

134 "I want to be living in [state place] \_\_\_\_\_ when I am 30 years old"

135

136 **Q15a.** Please complete the following statement:

137

138 "Most of my friends want to live in [list places] \_\_\_\_\_ when they

139 are older"

140

141 **Q16.** How likely are you to move away from the community? (check one)

142

143 Very likely

144 Likely

145 Do not know

146 Unlikely

147 Very unlikely

148

149 **Q16a.** If you answered 'Likely' or 'Very likely', list up to 3 key reasons why you would move away:

150 -

151 -

152 -

153

154 **Q16b.** If you answered 'Unlikely' or 'Very unlikely', list up to 3 key reasons why you would stay:

155 -

156 -

157 -

158

159

160  
161 **Q17.** If you were to leave, do you expect to return to the community in the future? (circle yes or no)  
162

163 Yes

164 No

165

166 **Q18.** Have you previously moved away from the community and returned? (circle yes or no)

167

168 Yes

169 No

170

171 **Q18a.** If you answered 'Yes' to Q18, can you please explain your reasons for returning?

172

173

174

175 **Territorial and forest perspectives**

176

177 **Q19.** Approximately, how big is your community's territory?

178

179 State area (in Sq. km, hectares, acres etc.):

180

181 **Q20:** How often do you go out into the community's territory?

182 (check the option that best applies to you)

183

184 Daily

185 Several times a week

186 Once a week

187 Once or twice a month

188 A few times a year, or less

189

190 **Q21.** What is the community's territory (including its forest) used for?

191

192 List up to 5 things that come to mind:

193 -

194 -

195 -

196 -

197 -

198

199 **Q22.** Do you or your family harvest products from the forest? (circle yes or no)

200

201 Yes

202 No

203

204

205 **Q22a.** If you answered 'Yes' to Q19, please list the most important products and state whether they  
206 are sold or used at home:

207

208 Forest product harvested

Domestic use OR for sale

209

210

211

212

213 **Q23.** Do you think the community's forest is in good health? (circle yes or no)

214

215 Yes

216 No

217

218 **Q24.** List any threats that you think the community's forest faces:

219 -

220 -

221 -

222 -

223

224 **Q25.** What would you like to see the community's territory and forest used for?

225

226

227

228 END of SURVEY

**Table S 3: Key Background Information on Workshop Locations and Participating Communities**

| Communities                 | Region / Country                      | Community population | Ethnic background                                                                   | Forest Ecosystem                                                                                                              | Main livelihood                                                                   | Forest dependency | Reasons for selection                                                                                                                                                                                                                                                                                                                                                                                                                                                                                                                                                                                                                                                                                                                         |
|-----------------------------|---------------------------------------|----------------------|-------------------------------------------------------------------------------------|-------------------------------------------------------------------------------------------------------------------------------|-----------------------------------------------------------------------------------|-------------------|-----------------------------------------------------------------------------------------------------------------------------------------------------------------------------------------------------------------------------------------------------------------------------------------------------------------------------------------------------------------------------------------------------------------------------------------------------------------------------------------------------------------------------------------------------------------------------------------------------------------------------------------------------------------------------------------------------------------------------------------------|
| Lac Simon                   | Abitibi-Témiscamingue, Québec, Canada | 2193                 | Anishinaabeg (Algonquin)                                                            | Southern boreal mixed forest (mostly spruce / fir / cedar / pine + birch / aspen)                                             | Jobs with band council, forestry, mining, construction, construction, restaurants | Moderate          | Like most other Anishinaabeg communities in Quebec, Lac Simon is located in a forest setting, a few km from the nearest urban centre. Most community members practice cultural activities on the land (in the forest). A few live permanently on the land and depend on the forest for subsistence. The others need the land for cultural activities, although their subsistence or livelihood does not entirely depend on it. Most community members hunt/trap/fish/collect plants on the land. Some community members work in forestry, mining or other jobs related to the land and resources.                                                                                                                                             |
| San Juan Evangelista Analco | Sierra Norte, Oaxaca, Mexico          | 406                  | Zapotec                                                                             | Dry tropical forest, dry temperate (oak) forest, temperate mixed oak-pine and pine-oak forests, temperate humid pine forests. | Agriculture and livestock, forestry, small businesses, ecotourism.                | Moderate          | 86 km or 2 hours north of Oaxaca City (state capital). Characterized by high rates of wage labour migration from 1970 to 2000. Past 12 years has seen community place emphasis on territorial resource use, including its first formal forest management plan (2013-2022), for which it won a national award for community forestry in 2016 SFM certification in 2017. This shift has created a new social dynamic within the community, but also debate as to whether the benefits accrued are meaningful given the level of work and responsibilities involved. The community leadership has expressed its interest in hearing the views and perspectives of its young people in relation to the future of the community and local forests. |
| Jalapa del Valle            | Valles Centrales, Oaxaca, Mexico      | 1,543                | No defined. Jalapa is an ejido of mixed ethnicities. Some Indigenous, some mestizo. | Temperate, mixed pine-oak and oak-pine forests                                                                                | Agriculture and livestock, small businesses, construction.                        | Low               | 20 km. from Oaxaca City. Many residents interact daily with the city (work, school, services). In the past, community livelihoods were tied to local forests. In 1975, the Community Assembly banned logging, designating their forests as a conservation area. Over time, people adopted other livelihoods, most of them urban. The community won a national prize for nature conservation in 2013. In recent years, the community has seen the negative consequences of a “no-touch” forest policy (plague, fire), and the need for a level of use and management. The Assembly is in the process of approving commercial forestry operations as a collective (rather than individually) enterprise.                                        |

| Communities                                                                                                            | Region / Country          | Community population                                          | Ethnic background                                  | Forest Ecosystem                              | Main livelihood                                                        | Forest dependency | Reasons for selection                                                                                                                                                                                                                                                                                                                                                                                                                                                                                                                                                                                                                                                                                                                                                                                                                                                                        |
|------------------------------------------------------------------------------------------------------------------------|---------------------------|---------------------------------------------------------------|----------------------------------------------------|-----------------------------------------------|------------------------------------------------------------------------|-------------------|----------------------------------------------------------------------------------------------------------------------------------------------------------------------------------------------------------------------------------------------------------------------------------------------------------------------------------------------------------------------------------------------------------------------------------------------------------------------------------------------------------------------------------------------------------------------------------------------------------------------------------------------------------------------------------------------------------------------------------------------------------------------------------------------------------------------------------------------------------------------------------------------|
| Held in Primero de Mayo, Participants also came from Primero de Mayo Community Annex                                   | Pando, Bolivia            | 36 families, 50 families                                      | Non-indigenous forest extractivists                | Terra firme forest, seasonally flooded forest | Brazil nuts, Acai fruits, shifting agriculture, temporary jobs, timber | Very High         | High youth population, diverse composition of peoples, and high dependency on forest products. Over half of the community members recently migrated to the community in the past 10 years, mainly from the city of Riberalta (one of the highest poverty levels in Bolivia). Community is located at the intersection of a road that connects recent settlements and the Brazilian border. Brazil nut collection is the primary source of cash income, followed by Acai fruit harvesting and timber extraction. People fully dedicate to Brazil nut collection from November through March. From April to June, Asai fruits are collected by community members trained in climbing the palm. Some members out-migrate to Cobija or Riberalta during non-Brazil nut season. There are limited opportunities for hired labour by the municipality, including school and hospital construction. |
| Held in San Antonio de Lomerio, Participants also came from Fátima and Las Trancas communities                         | Gran Chiquitania, Bolivia | 1260 (San Antonio)<br>288 (Fátima)<br>94 (Las Tranca)         | Primarily Indigenous, 95% of population is Monkoxi | Chiquitano Dry Forest, Cerrado                | Small scale cattle-ranching, shifting cultivation, timber, NTFPs       | Low               | There is high youth migration due to poor road development and few specialized job/academic opportunities. In recent years, forest products use has primarily been for house consumption. The Indigenous territory of Lomerío, of which San Antonio is the largest community out of 29, has a long-standing experience in forest management for timber harvest, but its logging permits have been revoked due to a lack of compliance with management rules and poor organization of its productive representation. IBIF is supporting the Indigenous territory by facilitating, supporting and building capacities to improve their forest governance, and co-lobby for the adaptation of forestry norms according to Indigenous communities' needs.                                                                                                                                        |
| Held in El Puquio Cristo Rey, Participants also came from San Lorenzo, Coloradillo, Surusubi, Santo Rosario, Monterito | Gran Chiquitania, Bolivia | 369 (El Puquio)<br><br>Other populations range from 85 to 333 | Monkoxi                                            | Chiquitano Dry Forest, Cerrado                | Small scale cattle-ranching, shifting cultivation, timber, NTFPs       | Low               | Primarily Indigenous. High youth migration due to poor road development and few specialized job/academic opportunities. Forest products are primarily used for household consumption. Lack of compliance with forest management rules has prevented them from obtaining further benefits from timber extraction. Community is part of the Lomerío Indigenous territory that IBIF is supporting to improve its forest governance.                                                                                                                                                                                                                                                                                                                                                                                                                                                             |



| Communities                                                                                                                        | Region / Country                            | Community population            | Ethnic background                                                                | Forest Ecosystem                                                                                                     | Main livelihood                                                                                                                                                     | Forest dependency | Reasons for selection                                                                                                                                                                                                                                                                                                                                                                                                                                                                                                                                                                                                                                                                                                                                                                                                                                      |
|------------------------------------------------------------------------------------------------------------------------------------|---------------------------------------------|---------------------------------|----------------------------------------------------------------------------------|----------------------------------------------------------------------------------------------------------------------|---------------------------------------------------------------------------------------------------------------------------------------------------------------------|-------------------|------------------------------------------------------------------------------------------------------------------------------------------------------------------------------------------------------------------------------------------------------------------------------------------------------------------------------------------------------------------------------------------------------------------------------------------------------------------------------------------------------------------------------------------------------------------------------------------------------------------------------------------------------------------------------------------------------------------------------------------------------------------------------------------------------------------------------------------------------------|
| Jyalachiti community forest, Panauti                                                                                               | Kavrepalanchow District, Nepal              | 20,000<br>4 separate localities | Dominated by Brahmin, Chhetri, Nawar castes, of Buddhist and Hindu denominations | Subtropical forest, with pine and broadleaf forest – community managed                                               | Agriculture and animal husbandry                                                                                                                                    | High              | Panauti Bazar is a small town 35 km southeast of Kathmandu. Famed for its variety of Buddhist and Hindu religious monuments – listed as a tentative UNESCO heritage site since 1996. Traditional agrarian society with most of the populace dependent on agriculture and animal husbandry, and few of them on tourism. Population has been growing very fast through immigration following the 2015 earthquake. Town comprises several settlements and community forests, including Jyalachiti.                                                                                                                                                                                                                                                                                                                                                            |
| Participants from multiple communities – Iberia, Palma Real, Diamante, Puerto Azul, Puerto Maldonado,, Santa Rosa Huacaria, Alerta | Madre de Dios, Peru                         | 141000                          | Yine, Harakbut, Ese Eja, non-Indigenous members                                  | Tropical forest (Peruvian Amazon)                                                                                    | Small-scale farming (cattle, corn, cacao, papaya, other fruits), timber, Brazil nut gathering, gold mining, tourism, other services                                 | High              | Biologically and culturally diverse region, with more than 30 indigenous communities and many other people depending on forests and its resources. Strong forest dependency. Madre de Dios is one of the most isolated regions of the country, but counts with the highest national immigration rates, caused principally by the surge of gold mining activities. In this new scenario, landscapes and communities are changing rapidly and young people can lose connections with their forest homes. In search of education and work opportunities, they migrate to urban areas in large numbers. The future of these communities is at stake.                                                                                                                                                                                                           |
| Uaxactún                                                                                                                           | Maya Biosphere Reserve, Department of Petén | 800                             | 98% ladinos, 2% q'eqchí                                                          | Humid subtropical forest. Between hilly and flat areas, there are stands of mahogany mixed with breadnut (Maya nut). | Sale of forest products: palma de xate, pepper, breadnut, gum. Seasonal work in sawmill; archaeology project, tourist services (food, lodging), rangers in Tikal NP | Very High         | Uaxactún in the north of Petén, established over 100 years ago as a camp used by chicozapote resin collectors, used to make chicle (Manilkara zapota). Its history has been closely tied to forest resource extraction. Until 1950 it was only reachable by plane. The Maya Biosphere Reserve was established in 1990 and after many years of work and internal organizing, Uaxactún requested the Guatemalan Government to grant it a 25-year forestry concession for 83,558 hectares of forest, which was granted in 2000. Through this concession and compliance with an approved forest management plan and payment of annual fees / taxes, the community has been able to carry out sustainable logging and extract NTFPs such as palma de xate ( <i>Chamaedorea spp</i> ), pimienta ( <i>Pimenta dioica</i> ), Ramón ( <i>Brosimum alicastrum</i> ). |
| Lwanunda                                                                                                                           | Masaka, Uganda                              | 1200                            | Ganda (Bantu ethnic/language group)                                              | -                                                                                                                    | Agriculture, fuelwood and timber production.                                                                                                                        | High              | Lwanunda is one of a series of small villages located outside Masaka, Uganda. Most residents rely on subsistence agriculture for food and income with forests playing a major role in daily life. Most of the natural forest has been harvested and forest reserves dating back to the colonial period are largely plantation forestry operations in this region. Fifty five percent of Uganda's population is under the age of 18 making it one of the youngest                                                                                                                                                                                                                                                                                                                                                                                           |

| Communities                                                                        | Region / Country                   | Community population                                                | Ethnic background                                                              | Forest Ecosystem               | Main livelihood                                                                   | Forest dependency | Reasons for selection                                                                                                                                                                                                                                                                                                                                                                                                                                                                                                                                                                                                                                                                                                                                                                                                                                                              |
|------------------------------------------------------------------------------------|------------------------------------|---------------------------------------------------------------------|--------------------------------------------------------------------------------|--------------------------------|-----------------------------------------------------------------------------------|-------------------|------------------------------------------------------------------------------------------------------------------------------------------------------------------------------------------------------------------------------------------------------------------------------------------------------------------------------------------------------------------------------------------------------------------------------------------------------------------------------------------------------------------------------------------------------------------------------------------------------------------------------------------------------------------------------------------------------------------------------------------------------------------------------------------------------------------------------------------------------------------------------------|
|                                                                                    |                                    |                                                                     |                                                                                |                                |                                                                                   |                   | populations in the world. Population growth and economic pressures are major factors in forest loss and forest management decisions.                                                                                                                                                                                                                                                                                                                                                                                                                                                                                                                                                                                                                                                                                                                                               |
| Buyege                                                                             | Wakiso, Uganda                     | 1500                                                                | -Ganda (Bantu ethnic/language group)                                           | -                              | Fishing, agriculture, timber and charcoal production.                             | High              | Buyege is a community located in a rural area near Lake Victoria. Traditional activities include fishing and farming but as fish stocks in the lake have been depleted many in the community are looking for other livelihood activities. Agriculture and small business in agriculture are common activities. Buyege is in relatively close proximity to the capital, Kampala and migration pressure on youth is high                                                                                                                                                                                                                                                                                                                                                                                                                                                             |
| Geita                                                                              | Geita, Tanzania                    | -                                                                   | -                                                                              | -                              | -                                                                                 | -                 |                                                                                                                                                                                                                                                                                                                                                                                                                                                                                                                                                                                                                                                                                                                                                                                                                                                                                    |
| Held in municipality of General Nakar, participants came from multiple communities | Region 4 - Calabarzon, Philippines | 25,973<br>Barangay Magsikap - 1,360<br>Barangay Catablingan - 2,169 | Tagalog (although participants were all non-Indigenous from same municipality) | Lowland tropical rainforest    | Agriculture, fishing, upland cultivation, non-timber forest products              | High              | General Nakar is the largest municipality of Quezon Province with a land area of 161,640 hectares. However, its population is one of the smallest (29,705 people in 2015). It is one of the largest ancestral domains in the country and is home to the Agta-Dumagat tribes. Several major watersheds that supply neighboring municipalities and Metro Manila are found within its territory. It is considered a key biodiversity area with several endemic and native flora and fauna species. Natural forest cover dwindled from 57% in 1993 to 22% in 2010 and 17% in 2015, driven by the conversion of forests for agricultural and plantations. The migration of youth to larger municipalities and cities has been observed in recent decades, driven by education and job opportunities. Initial work suggests that youth do not aspire to forest or other land-based work. |
| Poplar River                                                                       | Manitoba, Canada                   | 1534 (1245 on reserve)                                              | Anishinaabe                                                                    | Southern boreal / mixed forest | Jobs with band council, forestry, mining, construction, construction, restaurants | Low               | -                                                                                                                                                                                                                                                                                                                                                                                                                                                                                                                                                                                                                                                                                                                                                                                                                                                                                  |
